# Supplementary material for: On the Extent and Origins of Genic Novelty in the Phylum Nematoda
Source: PubMed Central journal article supplement (PMC2432500; doi:10.1371/journal.pntd.0000258), 2008-07-02
Supplement: pntd.0000258.s003.pdf [file pntd.0000258.s003.pdf]

**Table B – Family and Species-specific protein families**

| <b>Taxonomic family</b> | <b>species</b> | <b>Proteins Available</b> | <b>Proteins restricted to Nematoda</b> | <b>Family restricted protein families</b> | <b>species-specific protein families</b> |
|-------------------------|----------------|---------------------------|----------------------------------------|-------------------------------------------|------------------------------------------|
| Spiruromorpha           | 5              | 15896                     | 9621                                   | 35                                        | 3                                        |
| Diplogasteromorpha      | 1              | 4229                      | 1221                                   | 4                                         | 4                                        |
| Pangrolaimomorpha       | 3              | 10421                     | 5478                                   | 8                                         | 6                                        |
| Ascaridomorpha          | 3              | 10852                     | 7430                                   | 36                                        | 13                                       |
| Strongyloidea           | 7              | 20713                     | 12554                                  | 64                                        | 29                                       |
| Dorylaimida             | 1              | 4335                      | 1860                                   | 6                                         | 6                                        |
| Trichinellida           | 3              | 4861                      | 3546                                   | 14                                        | 5                                        |
| Rhabditoidea            | 2              | 62672                     | 26538                                  | 388                                       | 111                                      |
| Tylenchomorpha          | 13             | 55465                     | 26150                                  | 243                                       | 21                                       |

The phylogenetic distribution of taxonomically-restricted protein families. A protein family needed to contain at least five proteins to be included. In contrast to figure 4b, *C. elegans* containing protein families were used in this table. Counts of species-specific protein families consider only the species covered by that row's taxonomic family. While, a large proportion of taxonomically-restricted protein families are species-specific, many contain proteins from more than one species.
