# Supplementary material for: On the Extent and Origins of Genic Novelty in the Phylum Nematoda
Source: PubMed Central journal article supplement (PMC2432500; doi:10.1371/journal.pntd.0000258), 2008-07-02
Supplement: pntd.0000258.s005.pdf [file pntd.0000258.s005.pdf]

**Table D – Novel protein domains restricted to monophyletic taxa**

| <i>Taxon-specific</i> | <i>number of species with protein domain</i> |           |           |           |           |           |           |           |           |            |                                        |
|-----------------------|----------------------------------------------|-----------|-----------|-----------|-----------|-----------|-----------|-----------|-----------|------------|----------------------------------------|
|                       | <i>1+</i>                                    | <i>2+</i> | <i>3+</i> | <i>4+</i> | <i>5+</i> | <i>6+</i> | <i>7+</i> | <i>8+</i> | <i>9+</i> | <i>10+</i> |                                        |
| Ascaridomorpha        | 794                                          | 293       | 13        |           |           |           |           |           |           |            | <i>number of protein domain groups</i> |
| Caenorhabditida       | 14,785                                       | 12,302    |           |           |           |           |           |           |           |            |                                        |
| Spiruromorpha         | 1,230                                        | 824       | 175       | 39        | 2         |           |           |           |           |            |                                        |
| Strongylida           | 1,652                                        | 949       | 204       | 60        | 19        | 6         | 2         |           |           |            |                                        |
| Trichinellida         | 359                                          | 128       | 7         |           |           |           |           |           |           |            |                                        |
| Tylenchomorpha        | 5,464                                        | 3,885     | 1,108     | 401       | 164       | 48        | 18        | 8         | 2         | 1          |                                        |
