# Supplementary material for: On the Extent and Origins of Genic Novelty in the Phylum Nematoda
Source: PubMed Central journal article supplement (PMC2432500; doi:10.1371/journal.pntd.0000258), 2008-07-02
Supplement: pntd.0000258.s006.pdf [file pntd.0000258.s006.pdf]

**Table E - Plant-like enzymes identified in nematode proteomes**

| <i>EC number</i> | <i>Enzyme Name</i>                   | <i>Enzyme Description</i>                                                                         | <i>NemPep3 proteins with this annotation *</i>                                                                                                                                                                                                                                                                                                                                                                                                                                                                                                                                                                                                           |
|------------------|--------------------------------------|---------------------------------------------------------------------------------------------------|----------------------------------------------------------------------------------------------------------------------------------------------------------------------------------------------------------------------------------------------------------------------------------------------------------------------------------------------------------------------------------------------------------------------------------------------------------------------------------------------------------------------------------------------------------------------------------------------------------------------------------------------------------|
| 1.14.11.23       | flavonol synthase                    | synthesises quercetin, a nematotoxic isoflavonoid (Osman and Viglierchio 1988)                    | XIP02339_1                                                                                                                                                                                                                                                                                                                                                                                                                                                                                                                                                                                                                                               |
| 2.4.1.228        | scopoletin glucosyltransferase       | activates scopoletin to scopolin, which is involved in pathogen responses and lesion formation    | XIP03415_1                                                                                                                                                                                                                                                                                                                                                                                                                                                                                                                                                                                                                                               |
| 3.1.1.78         | polyneuridine-aldehyde esterase      | synthesis of the skeleton of sarpagan (an alkaloid and thus likely defence metabolite)            | MIP07018_1                                                                                                                                                                                                                                                                                                                                                                                                                                                                                                                                                                                                                                               |
| 3.2.1.15         | polygalacturonase                    | pectinase; hydrolysis of 1,4-alpha-D-galactosiduronic linkages in pectate and other galacturonans | MJP01724_1, MHP05484_2                                                                                                                                                                                                                                                                                                                                                                                                                                                                                                                                                                                                                                   |
| 3.2.1.67         | galacturan 1,4-alpha-galacturonidase | cell wall breakdown pectinase; exopolygalacturonase                                               | MAP00565_1, MIP04638_1                                                                                                                                                                                                                                                                                                                                                                                                                                                                                                                                                                                                                                   |
| 3.2.1.2          | beta-amylase                         | starch catabolism                                                                                 | <u>HGP00188_1</u>                                                                                                                                                                                                                                                                                                                                                                                                                                                                                                                                                                                                                                        |
| 3.2.1.4          | cellulase (several forms)            | catabolism of plant cell wall celluloses                                                          | GPP00099_1, GPP00676_1, P000664_1, GRP01255_1, HGP06814_1, <u>HGP03686_2</u> , <u>HGP07086_2</u> , <u>HGP07404_2</u> , <u>HGP06600_1</u> , HGP06861_2, <u>HSP00667_1</u> , HSP00991_1, HSP01296_1, <u>HSP00352_1</u> , MAP00224_1, <u>MAP00702_3</u> , MAP00702_2, <u>MCP01234_1</u> , MCP05954_1, <u>MCP00574_2</u> , <u>MCP00574_1</u> , MCP03969_1, <u>MCP00966_2</u> , <u>MHP03294_2</u> , <u>MHP04018_2</u> , <u>MHP03286_2</u> , MHP11140_1, MHP12261_1, MHP01099_1, <u>MHP04209_1</u> , MHP11913_1, MHP04129_1, MHP09658_1, MIP00115_1, MIP00028_2, MIP02244_1, MIP00867_1, <u>MJP04028_1</u> , MJP03779_1, <u>MJP04327_1</u> , <u>PVP00108_1</u> |

\* Underlined protein identifiers have predicted signal peptides.
