# Supplementary material for: On the Extent and Origins of Genic Novelty in the Phylum Nematoda
Source: PLoS Negl Trop Dis. 2008 Jul 2;2(7):e258. doi: 10.1371/journal.pntd.0000258 (PMC2432500; doi:10.1371/journal.pntd.0000258)
Supplement: Table S6 — Novel NemDom3 domains also identified in plants (includes protein identifiers) (0.45 MB PDF) [file pntd.0000258.s007.pdf]

**Table F - Novel NemDom3 domains also identified in plants (Viridiplantae)**

| <b>NemDom3 identifier</b> | <b>domain length (amino acids)</b> | <b>NemPep3 sequences *</b>                           | <b>Present in <i>C. elegans</i></b> | <b>Plant species</b>                                                                                                                                                                        | <b>UniProt accessions</b>                                                                                               | <b>functional annotation</b>                            |
|---------------------------|------------------------------------|------------------------------------------------------|-------------------------------------|---------------------------------------------------------------------------------------------------------------------------------------------------------------------------------------------|-------------------------------------------------------------------------------------------------------------------------|---------------------------------------------------------|
| ND_n0000006890            | 42                                 | MIP03120_1<br>MAP00264_1                             | yes                                 | <i>Oryza sativa</i><br><i>Prunus persica</i><br><i>Phaseolus vulgaris</i><br><i>Arabidopsis thaliana</i>                                                                                    | Q5Z9Q3, Q6MWB4, Q7XLT3<br>Q6DU55<br>Q94KF4, Q94KF5<br>Q67YK2, Q8GYF5, Q9LDZ5,<br>Q9LFL1, Q9FL01                         | wall-associated<br>receptor kinase-like 21<br>precursor |
| ND_n0000004827            | 42                                 | GPP00023_1<br>HGP00871_1                             | no                                  | <i>Zea mays</i>                                                                                                                                                                             | Q5EUC0                                                                                                                  | thiol oxidoreductase                                    |
| ND_n0000010444            | 56                                 | MCP03370_1<br>MAP00510_1<br>GPP00157_1               | yes                                 | <i>Lycopersicon esculentum</i>                                                                                                                                                              | GSHB_LYCES                                                                                                              | glutathione synthetase                                  |
| ND_n0000022177            | 83                                 | MAP00449_1<br>MIP05371_2                             | no                                  | <i>Oryza sativa</i>                                                                                                                                                                         | Q40625, Q2QVD7                                                                                                          | BZIP transcription<br>factor family                     |
| ND_n0000005472            | 41                                 | GRP00589_1<br>HGP03596_1<br>MHP01915_2               | yes                                 | <i>Arabidopsis thaliana</i><br><i>Solanum commersonii</i><br><i>Capsicum chinense</i><br><i>Brassica juncea</i><br><i>Cucurbita maxima</i><br><i>Euphorbia esula</i><br><i>Oryza sativa</i> | GST16_ARATH, Q1WW15<br>O22330<br>Q5DUH0<br>Q7XZT0, Q7XZT2, Q7XZT3<br>Q8GT24<br>Q9M533<br>Q56XF1, Q93WM2,<br>GSTH2_ORYSA | glutathione S-<br>transferase                           |
| ND_n0000017177            | 94                                 | MCP03902_1<br>MAP02489_1<br>MPP00736_1<br>MIP02987_1 | no                                  | <i>Arabidopsis thaliana</i>                                                                                                                                                                 | Q9ZQ31                                                                                                                  | hypothetical protein                                    |
| ND_n0000021399            | 51                                 | MJP01133_1<br>MHP05238_1                             | no                                  | <i>Arabidopsis thaliana</i>                                                                                                                                                                 | Q9FGC2                                                                                                                  | DNA helicase-like                                       |
| ND_N0000004924            | 39                                 | MAP00578_2<br>HSP00821_1                             | no                                  | <i>Triticum aestivum</i>                                                                                                                                                                    | Q84VR8                                                                                                                  | chimaeric SDH2-<br>RPS14 protein                        |

\* species codes are: MI *Meloidogyne incognita*, MA *M. arenaria*, MC *M. chitwoodii*, MJ *M. javanica*, MH *M. hapla*, HS *Heterodera schachtii*, HG *H. glycines*, HC *Haemonchus contortus*, GR *Globodera rostochiensis*, GP *G. pallida*
